# Supplementary material for: Electrodeposition of Au nanoparticles on poly(diallyldimethylammonium chloride) functionalized reduced graphene oxide sheets for voltammetric determination of nicotine in tobacco products and anti-smoking pharmaceuticals
Source: Royal Society of Chemistry journal article supplement (doi:10.1039/c6ra03399g), 2016-01-01

## Electrodeposition of Au nanoparticles on poly (diallyldimethylammonium chloride) functionalized reduced graphene oxide sheets for voltammetric determination of nicotine in tobacco products and anti-smoking pharmaceuticals

Yanqiu Jing<sup>1</sup>, Erge Lin<sup>1</sup>, Xinhong Su<sup>2</sup>, Yingjie Liu<sup>3</sup>, Huaiqi Li<sup>4</sup>, Xiuxiu Yuan<sup>1</sup>, Lu Ping<sup>4</sup>, Yikuan Fan<sup>2\*</sup>

**Fig. S1** Amperometric response of the PDDA-RGO/Au/GCE with successive additions of 10  $\mu\text{M}$  nicotine. Measured at 1.07 V.

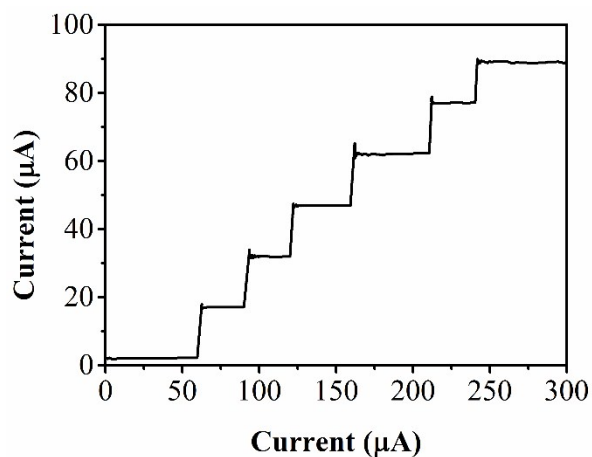

**Fig. S2** Schematic diagram of electrochemical oxidation of nicotine.

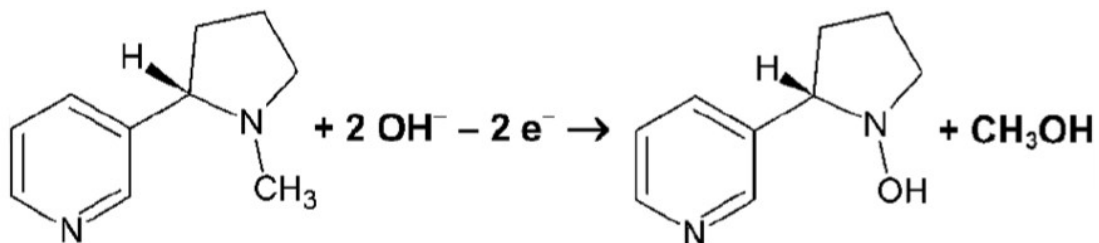

Supplement: c6ra03399g1.pdf [file c6ra03399g1.pdf]
